# Supplementary material for: Photoinduced electron transfer in layer-by-layer thin solid films containing cobalt oxide nanosheets, porphyrin, and methyl viologen
Source: Royal Society of Chemistry journal article supplement (doi:10.1039/c6cp07250j), 2017-01-01
Supplement: c6cp07250j1.pdf [file c6cp07250j1.pdf]

## Supporting Information

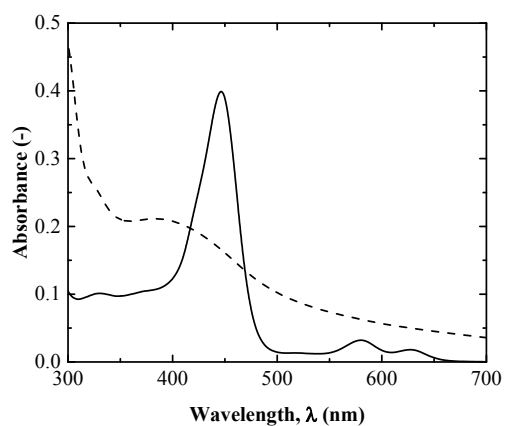

Fig. S1. UV-Vis absorption spectra of CoNS colloidal aqueous suspension (broken line) and TMPyP aqueous solution (solid line).

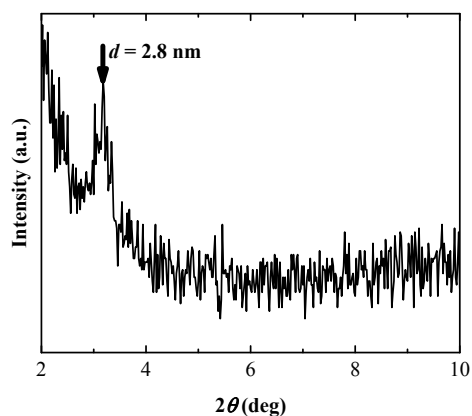

Fig. S2. XRD pattern of the LbL thin solid film with CoNS/TMPyP/CoNS sequence.

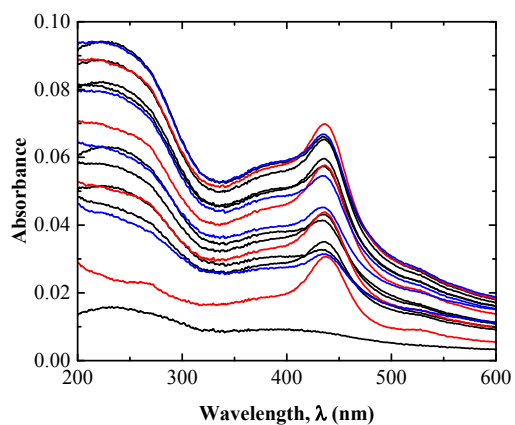

**Fig. S3.** UV-Vis absorption spectra of LbL thin solid film obtained after each operation (black lines: CoNS, red lines: TMPyP, and blue lines: MV).

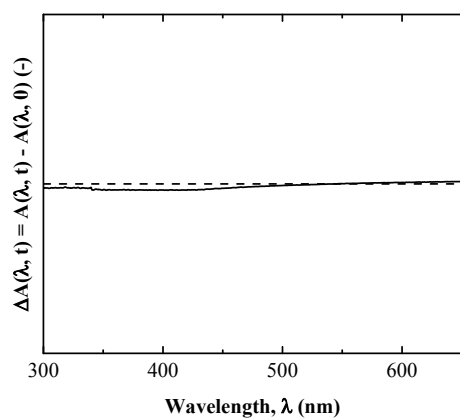

**Fig. S4.** UV-Vis differential spectrum after keeping irradiated LbL thin solid film in dark for 1 h under ambient atmosphere.
